# Supplementary material
Source: PubMed Central journal article supplement (PMC5621884)
Supplement: jciinsight-2-96101-s001.pdf [file jciinsight-2-96101-s001.pdf]

# Supplemental Figure 1

A

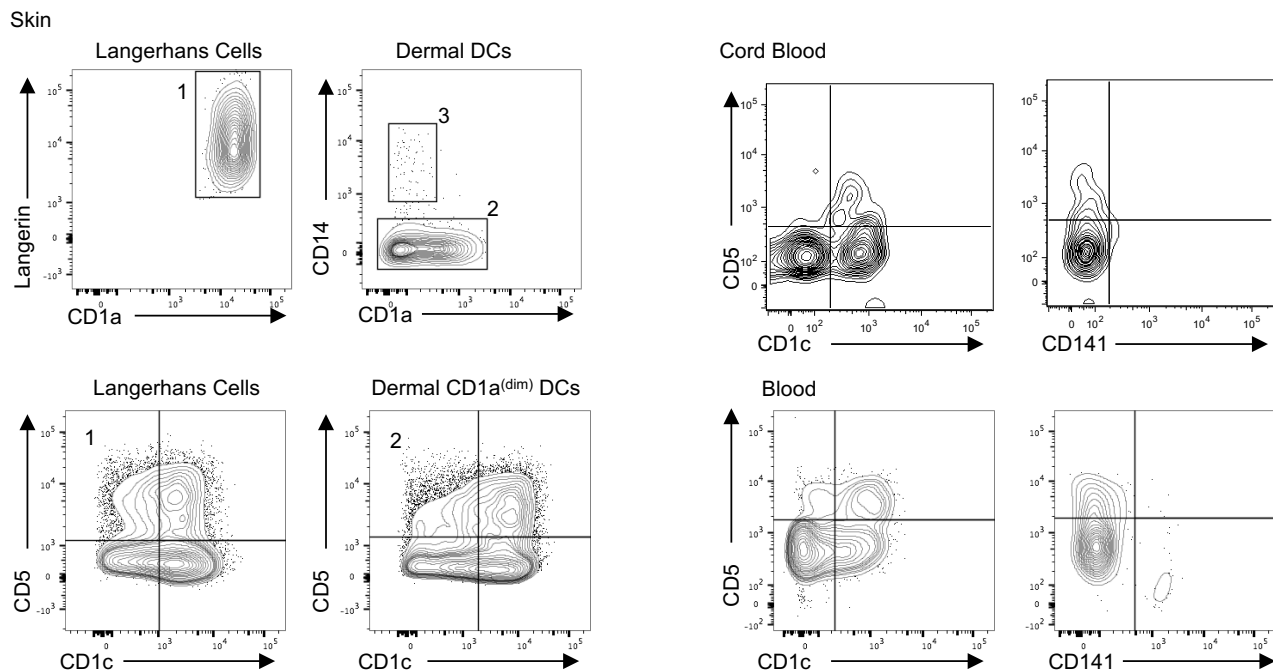

B

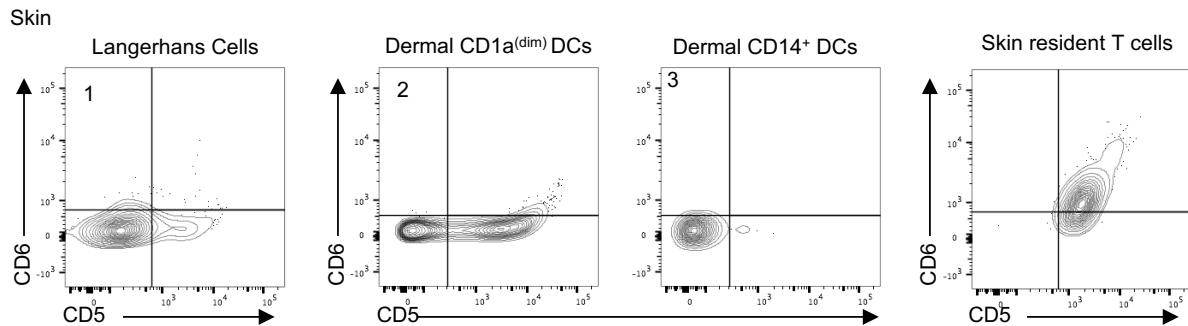

C

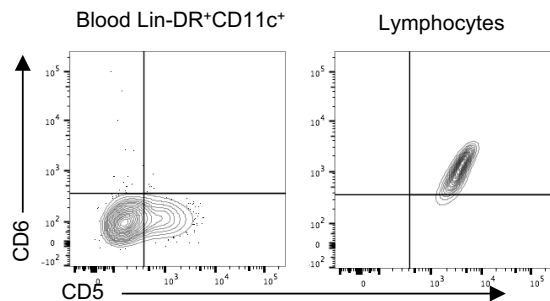

**Supplemental Figure 1. Characterization of skin and blood CD5<sup>+</sup> DCs.** (A) Plots show CD5 and CD1c expression on the surface of Left: skin LCs (population 1), dermal CD1a<sup>(dim)</sup> DCs (population 2), Right: cord blood and adults peripheral blood CD11c<sup>+</sup>CD1c<sup>+</sup> DCs and CD11c<sup>+</sup>CD141<sup>+</sup> DCs. One out of more than three independent donors is shown. (B) Plots show CD5 and CD6 expression on the surface of skin LCs (population 1), dermal CD1a<sup>(dim)</sup> DCs (population 2), dermal CD14<sup>+</sup> DCs (population 3) and on resident T cells.

# Supplemental Figure 2

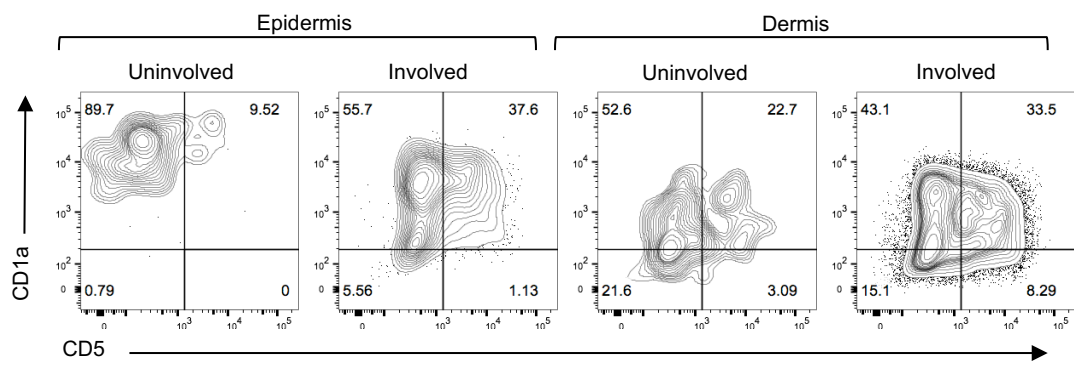

## Supplemental Figure 2. Expression of CD1a and CD5 in involved and uninvolved psoriatic plaques.

CD5 expression on epidermal and dermal DCs isolated from involved (left forearm) and uninvolved (left arm) lesions of psoriasis patient's 025 (see Table 1) skin. Graphs show the expression of CD1a and CD5 on the gated live HLA-DR<sup>+</sup>CD3/19<sup>-</sup> DCs.

# Supplemental Figure 3

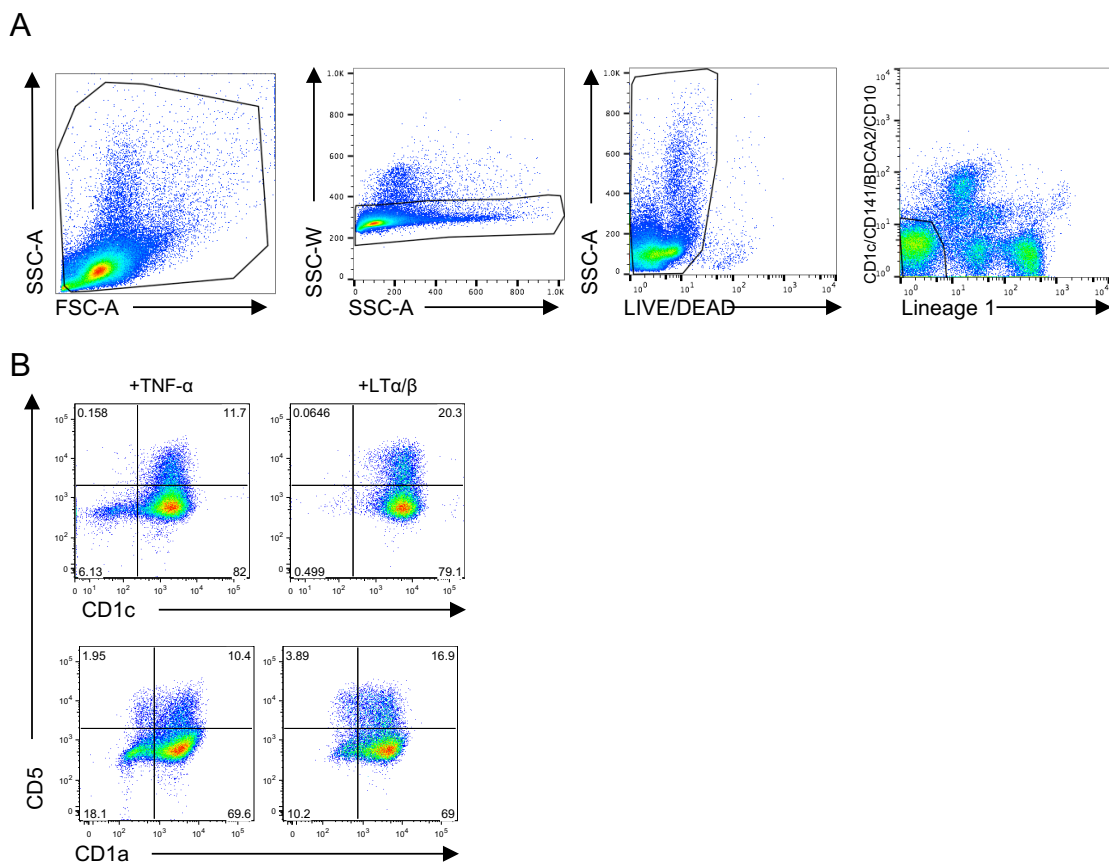

**Supplemental Figure 3.** (A) Gating strategy for purifying cord blood and dermal DC progenitors. Gating strategy Progenitors were sorted after gating on the  $\text{Lin}^{\text{neg}}(\text{CD3}^{\text{-}}\text{CD19}^{\text{-}}\text{CD56}^{\text{-}}\text{CD14}^{\text{-}}\text{CD66b}^{\text{-}})$   $\text{DC}^{\text{neg}}(\text{CD1c, BDCA2, CD141})\text{CD10}^{\text{-}}$  cells. (B)  $\text{CD45}^{\text{+}}\text{Lin}^{\text{neg}}(\text{CD3}^{\text{-}}\text{CD19}^{\text{-}}\text{CD56}^{\text{-}}\text{CD14}^{\text{-}}\text{CD66b}^{\text{-}})$   $\text{DC}^{\text{neg}}(\text{CD1c, BDCA2, CD141})\text{CD10}^{\text{-}}$   $\text{CD34}^{\text{+}}\text{CD117}^{\text{+}}\text{CD123}^{\text{-}}$  cells were sorted and cultured on MS-5 cells with  $\text{FLT3-L}^{\text{+}}\text{SCF}^{\text{+}}\text{GM-CSF}^{\text{+}}$  and in the presence of  $\text{TNF-}\alpha$  or  $\text{LT}\alpha/\beta$ . Plots show the frequency of  $\text{CD11c}^{\text{+}}\text{CD1a}^{\text{+}}\text{CD5}^{\text{+}}$  and  $\text{CD11c}^{\text{+}}\text{CD1c}^{\text{+}}\text{CD5}^{\text{+}}$  DCs on day seven. Flow cytometry plots are gated on live,  $\text{CD45}^{\text{+}}\text{HLA-DR}^{\text{+}}\text{CD11c}^{\text{+}}$  cells.

# Supplemental Figure 4

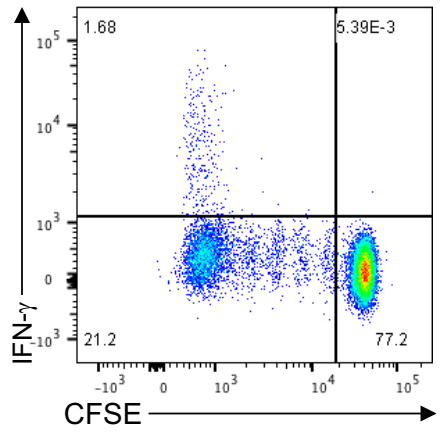

**Supplemental Figure 4.** Gating strategy for purifying proliferated CFSE<sup>(low)</sup> T cells. Flow cytometry plot is gated on live, CD45<sup>+</sup>CD3<sup>+</sup>CD11c<sup>-</sup> cells and shows the expression of CFSE and IFN- $\gamma$ .

**Supplemental Table 1. Fluorescent Antibodies Used**

| <b>Antigen</b>                               | <b>Fluorochrome</b> | <b>Clone</b>                                                                    | <b>Manufacturer</b> |
|----------------------------------------------|---------------------|---------------------------------------------------------------------------------|---------------------|
| CD1a                                         | Pacific Blue        | HI149                                                                           | Biologend           |
| CD1c                                         | PE                  | AD5-8E7                                                                         | Miltenyi Biotec     |
| CD3                                          | AF700               | UCHT1                                                                           | BD Biosciences      |
| CD4                                          | BV421               | RPA-T4                                                                          | BD Biosciences      |
| CD5                                          | FITC                | BL1a                                                                            | Beckman Coulter     |
| CD8                                          | APC-H7              | SK1                                                                             | BD Biosciences      |
| CD10                                         | PE                  | HI10a                                                                           | BD Biosciences      |
| CD11b                                        | PE                  | ICRF44                                                                          | Biologend           |
| CD11c                                        | BV711               | B-ly6                                                                           | BD Biosciences      |
| CD14                                         | QDot605             | TüK4                                                                            | Invitrogen          |
| CD19                                         | AF700               | HIB19                                                                           | BD Biosciences      |
| CD34                                         | APC                 | 8G12                                                                            | BD Biosciences      |
| CD45RA                                       | FITC                | MEM-56                                                                          | Invitrogen          |
| CD45RA                                       | BV605               | HI100                                                                           | Biologend           |
| CD56                                         | AF700               | HCD56                                                                           | Biologend           |
| CD83                                         | FITC                | HB15e                                                                           | Biologend           |
| CD86                                         | PE                  | 2331 (FUN-1)                                                                    | BD Biosciences      |
| CD117                                        | PC7                 | 104D2D1                                                                         | Beckman Coulter     |
| CD123                                        | PE-CF594            | 7G3                                                                             | BD Biosciences      |
| CD141                                        | PE                  | AD5-14H12                                                                       | Miltenyi Biotec     |
| CD141                                        | APC                 | AD5-14H12                                                                       | Miltenyi Biotec     |
| Langerin (CD207)                             | PE                  | DCGM4                                                                           | Beckman Coulter     |
| BDCA2 (CD303)                                | PE                  | AC144                                                                           | Miltenyi Biotec     |
| CCR7                                         | AF700               | 150503                                                                          | R and D Systems     |
| GranzymeB                                    | APC                 | GB11                                                                            | Invitrogen          |
| HLA-DR                                       | APC-H7              | G46-6                                                                           | BD Biosciences      |
| IL-22                                        | PE                  | 142928                                                                          | R and D Systems     |
| IL-17                                        | APC                 | eBio64DEC17                                                                     | eBioscience         |
| IFN- $\gamma$                                | PE-Cy7              | B27                                                                             | BD Biosciences      |
| Lineage 1: CD3, CD14, CD16, CD19, CD20, CD56 | FITC                | CD3: SK7, CD14: M $\Phi$ P9, CD16: 3G8, CD19: SJ25C1, CD20: L27, CD56: NCAM16.2 | BD Biosciences      |
| Aqua Live/Dead                               | Amcyan              | Catalog# L34966                                                                 | Invitrogen          |
| Blue Live/Dead                               | Ultaviolet          | Catalog# L34962                                                                 | Invitrogen          |
